# Supplementary material for: Functional potential of Peruvian fava bean flours in bread: antioxidant activity and phenolic bioaccessibility
Source: Research Square preprint supplement (doi:10.21203/rs.3.rs-8059987/v1), 2025-12-05
Supplement: Supplementary file 1 [file 1316c65a9948785e175e916c.docx]

Table 5. Bioaccessibility of total phenolics and the effect of simulated gastrointestinal digestion on the antioxidant potential of breads produced with Peruvian fava bean flours from different cultivars.

| Sample | Antioxidant potential (µmol TE/g) | | TPC (mg EAG/g) |
| --- | --- | --- | --- |
| ABTS | DPPH |
| WB | 1.25±0.10e | 0.21±0.04c | 0.35±0.07d |
| D-WB | 1.79±0.34e | 1.44±0.62f | 2.34±0.16ab |
| D/UD | 1.4 | 6.86 | 6.68 |
|  | | | |
| VB 10% | 1.87±0.12dD | 0.20±0.10cH | 0.49±0.04cD |
| D-VB 10% | 2.08±0.25eCD | 1.61±0.16eE | 1.86±0.32cABC |
| D/UD | 1.11 | 8.05 | 3.79 |
|  | | | |
| VB 20% | 2.93±0.08abAB | 0.27±0.03bcFGH | 0.54±0.03bD |
| D-VB 20% | 2.73±0.33deCD | 2.24±0.06cC | 2.17±0.39abcABC |
| D/UD | 0.93 | 8.30 | 4.02 |
|  | | | |
| QB 10% | 1.98±0.04dCD | 0.27±0.04bcFGH | 0.49±0.02cD |
| D-QB 10% | 2.04±0.31deCD | 1.88±0.05dD | 1.89±0.27bcBC |
| D/UD | 1.03 | 6.96 | 3.86 |
| QB 20% | 3.06±0.08aA | 0.23±0.04cGH | 0.62±0.03aD |
| D-QB 20% | 2.56±0.13bcB | 2.60±0.16bB | 2.54±0.46aA |
| D/UD | 0.84 | 11.30 | 4.10 |
|  |  |  |  |
| PB 10% | 2.17±0.06cC | 0.35±0.06aFG | 0.51±0.02bcD |
| D-PB 10% | 2.23±0.12cdC | 2.12±0.04cC | 2.34±0.41abABC |
| D/UD | 1.03 | 6.06 | 4.59 |
|  |  |  |  |
| PB 20% | 2.84±0.14bAB | 0.39±0.05aF | 0.56±0.02abD |
| D-PB 20% | 2.24±0.10cdC | 2.96±0.05aA | 2.37±0.55abAB |
| D/UD | 0.79 | 7.59 | 4.23 |

Legends: CB: control bread (100% wheat flour); VB: bread with partial substitution (10% or 20%) of wheat flour with Green fava bean flour; QB: bread with partial substitution of wheat flour with Quelcao fava bean flour; PB: bread with partial substitution of wheat flour with Peruanita fava bean flour; D: simulated gastrointestinal digestion; UD: undigested; GAE: gallic acid equivalent; CE: catechin equivalent. Results are expressed as mean ± standard deviation. Different lowercase letters (including all formulations) and uppercase letters (excluding the control formulation – CB) within the same column indicate statistically significant differences according to analysis of variance (ANOVA) at p ≤ 0.05, followed by Tukey’s post hoc test at p ≤ 0.05.
