# Supplementary material for: Functional potential of Peruvian fava bean flours in bread: antioxidant activity and phenolic bioaccessibility
Source: Research Square preprint supplement (doi:10.21203/rs.3.rs-8059987/v1), 2025-12-05
Supplement: Supplementary file 2 [file 146276bc04019f844b8e0780.docx]

Supplementary material 1

1. **Determination of antioxidant potential by the ABTS•⁺ radical scavenging method**

The antioxidant potential was determined using the spectrophotometric method based on the discoloration of the ABTS•⁺ cationic radical (2,2′-azinobis(3-ethylbenzothiazoline-6-sulfonic acid)), resulting from its neutralization by antioxidant compounds present in the samples [1, 2]. The ABTS•⁺ solution was prepared by mixing a 7 mM aqueous ABTS•⁺ solution with a 2.45 mM potassium persulfate solution, followed by incubation in the dark at room temperature for 12 h. The resulting solution was then diluted until reaching an absorbance of 0.70 ± 0.05, measured using a BelPhotonics Ultraviolet/Visible-M51 spectrophotometer (Monza, Milan, Italy) set at a wavelength of 734 nm.

The color difference between the reading of the fully colored solution, considered as 100% ABTS•⁺ free radicals (750 μL of ABTS•⁺ + 250 μL of 70% v/v ethanol solution), and the reading of the ABTS•⁺ radical solution containing the sample extract (750 μL of ABTS•⁺ + 250 μL of appropriately diluted sample) was measured after incubation in the dark for 15 min. The mixture was analyzed using a spectrophotometer at 734 nm. The results were compared with an analytical calibration curve constructed with seven points corresponding to different concentrations (1–17 nmol/mL) of a Trolox standard solution. Two blank solutions were prepared by replacing the sample aliquot with water while maintaining the ABTS•⁺ solution. Absorbance values obtained from each sample were corrected by subtracting the corresponding blank solution readings, which exhibited the highest absorbance values. Results were expressed as micromoles of Trolox equivalent per gram (µmol TE/g).

1. **Determination of antioxidant potential by the DPPH radical scavenging method**

The DPPH (1,1-diphenyl-2-picrylhydrazyl) radical scavenging activity of antioxidants was quantified using Trolox as a reference standard [1, 3]. An aliquot of 100 μL of each appropriately diluted sample was placed in a test tube containing 650 μL of 0.10 mM DPPH solution prepared in methanol, manually homogenized, and kept in the dark at room temperature for 30 min. Absorbance was measured at 517 nm using a spectrophotometer, and antioxidant activity was calculated based on the regression equation obtained from a calibration curve constructed with seven points corresponding to different concentrations of Trolox (1–14.7 nmol/mL) and the DPPH radical scavenging rate. Two blank solutions were prepared by replacing the sample aliquot with water while maintaining the DPPH solution. Absorbance values obtained from each sample were corrected by subtracting the corresponding blank solution readings, which exhibited the highest absorbance values. Results were expressed as micromoles of Trolox equivalent per gram (µmol TE/g).

1. **Determination of total phenolic content (TPC)**

The total phenolic content of the samples was determined according to the method described by Salvador-Reyes et al. [1], based on Folin and Denis [4]. An aliquot of 160 µL of the properly diluted sample, obtained from the extract, was added to a test tube containing 80 µL of the Folin–Ciocalteu reagent and manually agitated for 10 s. Subsequently, 640 µL of Na₂CO₃ solution (7.5% w/v) was added, and the mixture was incubated in the dark at 25 °C for 30 min. Absorbance was measured at 756 nm using a spectrophotometer. Quantification was performed using the linear regression equation obtained from a standard curve constructed with seven points, corresponding to different concentrations of gallic acid standard (1–10 µg/mL). Results were expressed as milligrams of gallic acid equivalents per gram of sample (mg GAE/g).

1. **Determination of total flavonoid contente (TFC)**

The total flavonoid content was determined according to the methodology previously described by Christ and Müller [5], with modifications [1]. An aliquot of 625 µL of the properly diluted sample was added to a test tube. Subsequently, 37.5 µL of sodium nitrite (NaNO₂) solution (5% w/v) was added, and the mixture was manually agitated for approximately 10 s and incubated for 5 min at 25 °C. After incubation, 37.5 µL of aluminum chloride (AlCl₃) solution (10% w/v) was added. The mixture was manually agitated for 10 s and incubated again for 5 min at 25 °C. Then, 250 µL of sodium hydroxide (NaOH) solution (1 M) and 350 µL of distilled water were added, and the tubes were manually agitated and incubated under the same conditions as previously described. Absorbance was measured using a spectrophotometer (BelPhotonics Ultraviolet/Visible-M51 model, Monza, Milan, Italy) at a wavelength of 510 nm. A catechin standard curve was constructed and used for quantification, and the results were expressed as milligrams of catechin equivalents per gram of sample (mg CE/g).

**References**

1. Salvador-Reyes R., Furlan LC, Martínez-Villaluenga C, Dala-Paula B M, Nabeshima EH, Pinto CC, Souza SMde, Pallone JAL, & Clerici MTPS (2024) Peruvian fava beans for health and food innovation: physicochemical, morphological, nutritional, and techno-functional characterization. Food Res. Int. 192, 114814. <https://doi.org/10.1016/j.foodres.2024.114814>
2. Re R, Pellegrini N, Proteggente A, Pannala A, Yang M, & Rice-Evans C (1999) Antioxidant activity applying an improved ABTS radical cation decolorization assay. *Free Radic. Biol. Med.* 26(9–10), 1231–1237. <https://doi.org/10.1016/S0891-5849(98)00315-3>
3. Brand-Williams W, Cuvelier ME, & Berset C (1995) Use of free-radical method to evaluate antioxidant activity. *LWT - Food Sci. Technol.* 28, 25–30. <https://doi.org/10.1016/S0023-6438(95)80008-5>
4. Folin O, & Denis W (1912) On phosphotungstic-phosphomolybdic compounds as color reagents. *JBC* 12(2), 239–243. <https://doi.org/10.1016/S0021-9258(18)88697-5>
5. Christ B, & Müller KH (1960) Zur serienm¨aßigen Bestimmung des Gehaltes an Flavonol-Derivaten in Drogen. *Archiv der Pharmazie* 293(12), 1033–1042. <https://doi.org/10.1002/ardp.19602931202>
