# Supplementary material for: Functional potential of Peruvian fava bean flours in bread: antioxidant activity and phenolic bioaccessibility
Source: Research Square preprint supplement (doi:10.21203/rs.3.rs-8059987/v1), 2025-12-05
Supplement: Supplementary file 3 [file 401696a266b63c26574f7e81.docx]

Table 1. Formulations of mixed flours from peruvian fava beans and wheat

| Formulation | Wheat flour (%) | Peruvian fava bean flour (%) | | |
| --- | --- | --- | --- | --- |
| *Verde* | *Quelcao* | *Perunaita* |
| Control | 100 | - | - | - |
| *Verde* 10% | 90 | 10 | - | - |
| *Verde* 20% | 80 | 20 | - | - |
| *Quelcao* 10% | 90 | - | 10 | - |
| *Quelcao* 20% | 80 | - | 20 | - |
| *Peruanita* 10% | 90 | - | - | 10 |
| *Peruanita* 20% | 80 | - | - | 20 |
