# Supplementary material for: Functional potential of Peruvian fava bean flours in bread: antioxidant activity and phenolic bioaccessibility
Source: Research Square preprint supplement (doi:10.21203/rs.3.rs-8059987/v1), 2025-12-05
Supplement: Supplementary file 4 [file 74c1b6b1ee13528ba1b0e02a.docx]

Table 2. Antioxidant activity (ABTS and DPPH assays), total phenolic content, and flavonoid content of raw flours from different Peruvian fava bean (*Vicia faba*) cultivars

| Sample | Antioxidant potential (µmol TE/g) | | TPC (mg EAG/g) | TFC (mg EC/g) |
| --- | --- | --- | --- | --- |
| ABTS | DPPH |
| WF | 1.33 ± 0.09c | 0.22 ± 0.03d | 0.30 ± 0.02c | 0.40 ± 0.02a |
| VF | 23.78 ± 0.99b | 0.55 ± 0.04c | 1.40 ± 0.09b | 0.79 ± 0.02a |
| QF | 24.05 ± 0.73b | 0.77 ± 0.54b | 1.50 ± 0.09b | 0.78 ± 0.03a |
| PF | 26.13 ± 0.93a | 0.90 ± 0.10a | 1.61 ± 0.08a | 0.80 ± 0.03b |

Leg.: WF: wheat flour; VF: Green fava bean flour; QF: Chelcao fava bean flour; Pf: Peruanita fava bean flour; GAE: gallic acid equivalent; CE: catechin equivalent. Results are expressed as the ± standard deviation. Different letters within the same column indicate statistically significant differences according to analysis of variance (ANOVA) (p≤0.05), followed by Tukey’s test (p≤0.05).
