# Supplementary material for: Functional potential of Peruvian fava bean flours in bread: antioxidant activity and phenolic bioaccessibility
Source: Research Square preprint supplement (doi:10.21203/rs.3.rs-8059987/v1), 2025-12-05
Supplement: Supplementary file 5 [file 8212094686921b0db143af6d.docx]

Table 4. Bioaccessibility of total phenolic content (TPC) and the effect of simulated gastrointestinal digestion on the antioxidant potential of Peruvian fava bean flours from different cultivars.

| Sample | Antioxidant potential (µmol TE/g) | | TPC (mg EAG/g) |
| --- | --- | --- | --- |
| ABTS | DPPH |
| WF | 1.33±0.09c | 0.22±0.03d | 0.30±0.02c |
| D-WF | 2.87±0.09c | 2.49±0.45c | 2.67±0.38b |
| D/UD | 2.16 | 11.32 | 8.90 |
|  | | | |
| VF | 23.78±0.99b | 0.55±0.04c | 1.40±0.09b |
| D-VF | 56.78±7.85a | 13.52±1.53b | 4.60±0.95a |
| D/UD | 2.39 | 24.58 | 3.26 |
|  | | | |
| QF | 24.05±0.73b | 0.77±0.54b | 1.50±0.09b |
| D-QF | 55.73±10.02a | 14.77±2.97b | 4.36±0.84a |
| D/UD | 2.32 | 19.18 | 2.91 |
|  | | | |
| PF | 26.13±0.93a | 0.90±0.10a | 1.61±0.08a |
| D-PF | 56.17±5.33a | 18.43±2.39a | 4.70±0.89a |
| D/UD | 2.15 | 20.48 | 2.92 |

Legend: WF: wheat flour; VF: green fava bean flour; QF: Quelcao fava bean flour; PF: Peruanita fava bean flour; D: simulated gastrointestinal digestion; UD: undigested; GAE: gallic acid equivalent; CE: catechin equivalent. Results are expressed as mean ± standard deviation. Different letters within the same column indicate statistically significant differences according to Analysis of Variance (ANOVA, p≤0.05), followed by Tukey’s post hoc test (p≤0.05).
