# Supplementary material for: Functional potential of Peruvian fava bean flours in bread: antioxidant activity and phenolic bioaccessibility
Source: Research Square preprint supplement (doi:10.21203/rs.3.rs-8059987/v1), 2025-12-05
Supplement: Supplementary file 6 [file ea24ae85f25dea1a12ddce16.docx]

Table 3. Antioxidant potential (ABTS and DPPH), total phenolic content, and flavonoid content of breads prepared with Peruvian fava bean flours from different cultivars

| Sample | Antioxidant potential (µmol TE/g) | | TPC (mg EAG/g) | TFC (mg EC/g) |
| --- | --- | --- | --- | --- |
| ABTS | DPPH |
| CB | 1.25 ± 0.10e | 0.21 ± 0.04c | 0.35 ± 0.07d | 0.35 ± 0.04b |
| VB 10% | 1.87 ± 0.12d | 0.20 ± 0.10c | 0.49 ± 0.04c | 0.37 ± 0.03b |
| VB 20% | 2.93 ± 0.08ab | 0.27 ± 0.03bc | 0.54 ± 0.03b | 0.40 ± 0.05b |
| QB 10% | 1.98 ± 0.04d | 0.27 ± 0.04bc | 0.49 ± 0.02c | 0.48 ± 0.02a |
| QB 20% | 3.06 ± 0.08a | 0.23 ± 0.04c | 0.62 ± 0.03a | 0.47 ± 0.03a |
| PB 10% | 2.17 ± 0.06c | 0.35 ± 0.06a | 0.51 ± 0.02bc | 0.48 ± 0.03a |
| PB 20% | 2.84 ± 0.14b | 0.39 ± 0.05a | 0.56 ± 0.02ab | 0.40 ± 0.06b |

Leg.: CB: control bread (100% wheat flour); VB: bread with partial replacement (10% or 20%) of wheat flour with Green fava bean flour; QB: bread with partial replacement of wheat flour with Quelcao fava bean flour; PB: bread with partial replacement of wheat flour with Peruanita fava bean flour; EAG: gallic acid equivalent; EC: catechin equivalent. Results are expressed as mean ± standard deviation. Different letters within the same column indicate statistically significant differences according to Analysis of Variance (ANOVA), followed by Tukey’s test (p ≤ 0.05).
