# Supplementary material for: Functional potential of Peruvian fava bean flours in bread: antioxidant activity and phenolic bioaccessibility
Source: Research Square preprint supplement (doi:10.21203/rs.3.rs-8059987/v1), 2025-12-05
Supplement: Supplementary file 7 [file f79ad27dcc714a2875fdf2fa.docx]

**Supplementary material 2**

**Total phenolic content and total flavonoid content bioaccessibility assay and effect of *in vitro* digestion on antioxidant potential**

Gastrointestinal digestion was performed according to the INFOGEST protocol [1, 2] with minor modifications.

In the oral phase, 5 g of previously grated fava bean bread sample was mixed in a 50 mL Falcon tube with 4 mL of simulated salivary fluid [KCl, KH₂PO₄, NaHCO₃, MgCl₂(H₂O)₆, (NH₄)₂CO₃, HCl], 25 µL of 0.3 M CaCl₂(H₂O)₂, and 975 µL of salivary amylase solution to achieve a final enzymatic activity of 75 U/mL, considering a final sample and simulated fluid volume of 10 mL. The ratio of bread sample to simulated salivary fluid was 1:1 (w/w). The mixture was incubated at 37 °C under agitation (50 rpm) for 2 min.

During the gastric phase, the entire oral-phase solution was adjusted to pH 3.0 using 300 μL of 1 M HCl and mixed with 8.5 mL of simulated gastric fluid [KCl, KH₂PO₄, NaHCO₃, NaCl, MgCl₂(H₂O)₆, (NH₄)₂CO₃, HCl], 5 µL of 0.3 M CaCl₂(H₂O)₂, and 1,195 µL of pepsin to reach a final enzymatic activity of 2,000 U/mL in a total volume of 20 mL. The mixture was incubated at 37 °C under agitation (50 rpm) for 2 h.

In the intestinal phase, the entire gastric digestion solution was adjusted to pH 7.0 using 450 μL of 1 M NaOH and combined with 11.51 mL of simulated intestinal fluid [KCl, KH₂PO₄, NaHCO₃, NaCl, MgCl₂(H₂O)₆, (NH₄)₂CO₃, HCl], 40 µL of 0.3 M CaCl₂(H₂O)₂, 3 mL of bile salt solution, and 5 mL of pancreatin solution to achieve final bile concentration and trypsin activity in pancreatin of 10 mM and 100 U/mL, respectively, in a total volume of 40 mL. The mixture was incubated at 37 °C under agitation (50 rpm) for 2 h. Enzymatic activity was stopped at the end of the *in vitro* digestion by immersing the test tube in an ice bath.

The final mixture was centrifuged at 7,000 × g for 10 min at 4 °C (Eppendorf SE centrifuge, Model 5810 R, Hamburg, Germany). The supernatant was then collected, filtered, and stored in Eppendorf tubes at −80 °C until antioxidant potential, total phenolic content, and total flavonoid content analyses. The digestion protocol was carried out in triplicate. Control treatments were performed without the addition of the respective enzymes but including bile salts, all simulated fluids, and maintaining identical pH, temperature, and agitation conditions.

**References**

1. Brodkorb A, Egger L, Alminger M, Alvito P, … & Recio I (2019) INFOGEST static *in vitro* simulation of gastrointestinal food digestion. Nature Protocols 14(4), 991-1014. <https://doi.org/10.1038/s41596-018-0119-1>.
2. Minekus M, Alminger M, Alvito P, Ballance S, Bohn T, Bourlieu C, ... & Brodkorb A (2014) A standardised static *in vitro* digestion method suitable for food—An international consensus. Food Funct. 5, 1113-1124. <https://doi.org/10.1039/C3FO60702J>. Acesso em: 22 maio 2023.
